# Supplementary material for: Antibacterial Potential Analysis of Novel α-Helix Peptides in the Chinese Wolf Spider Lycosa sinensis
Source: MDPI journal article supplement (doi:10.3390/pharmaceutics14112540), 2022-11-21
Supplement: s1 [file s1]

## ***Supplementary Information***

### **Antibacterial potential analysis of novel $\alpha$ -helix peptides in the Chinese wolf spider *Lycosa sinensis***

Huaxin Tan<sup>1</sup>, Junyao Wang<sup>1</sup>, Yuxin Song<sup>1</sup>, Sisi Liu<sup>1</sup>, Ziyang Lu<sup>1</sup>, Haodang Luo<sup>3\*</sup> and  
Xing Tang<sup>2\*</sup>

1. Department of Biochemistry and Molecular Biology, The Key Laboratory of Ecological Environment and Critical Human Diseases Prevention of Hunan Province Department of Education, School of Basic Medicine, Hengyang Medical School, University of South China, Hengyang, 421001, China
  2. Hunan Key Laboratory for Conservation and Utilization of Biological Resources in the Nanyue Mountainous Region, College of Life Sciences, Hengyang Normal University, Hengyang, 421002, China
  3. Department of Clinical Laboratory, The Affiliated Nanhua Hospital, Hengyang Medical School, University of South China, Hengyang, 421001, China
- Email: haodangluo89@gmail.com (H.L.); xtang2018@hynu.edu.cn (X.T.)

**A**

| Peptide name | Homology AMPs |         |                       |           |
|--------------|---------------|---------|-----------------------|-----------|
|              | Name          | APD ID  | Similarity percentage | Organism  |
| LS-AMP-E1    | Uperin 2.7    | AP00321 | 45.83%                | Toad      |
| LS-AMP-F1    | GLK-19        | AP00142 | 45.45%                | Synthetic |
| LS-AMP-G1    | Latarcin 3b   | AP01013 | 50.00%                | Spider    |

**B**

|             |                               |    |
|-------------|-------------------------------|----|
| LS-AMP-E1   | ---AGMKNIIDAIKKKLGGKL-----    | 18 |
| Uperin 2.7  | -----GIIDIAKKLVGGIRNVLGI----- | 19 |
| LS-AMP-F1   | ---TGLGKIGYLMKKLLSKAKV-----   | 19 |
| GLK-19      | -----GLKKLLGKLLKKLGKLLK-----  | 19 |
| LS-AMP-G1   | SWAVMLPDLVRQ---KLKQRW-----    | 18 |
| Latarcin 3b | SWASMAKKLKEYMEKLKQRA-----     | 20 |

Figure S1. The sequence homology matching by the Antimicrobial Peptide Database (A). Multiple sequence alignment of LS-AMPs with homology AMPs (B).

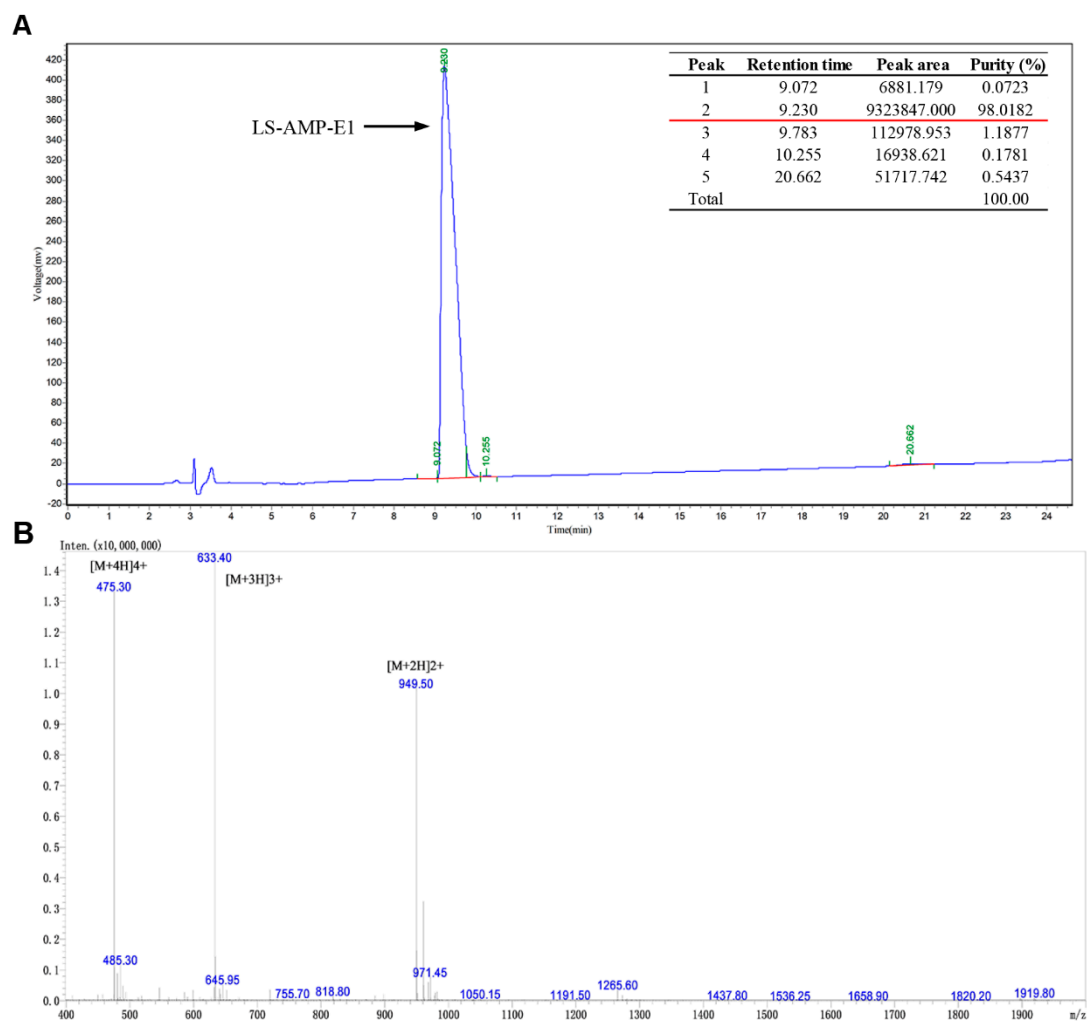

Figure S2. The High-performance liquid chromatography (HPLC) (A) and Mass spectrometry (MS) (B) profiles of LS-AMP-E1.

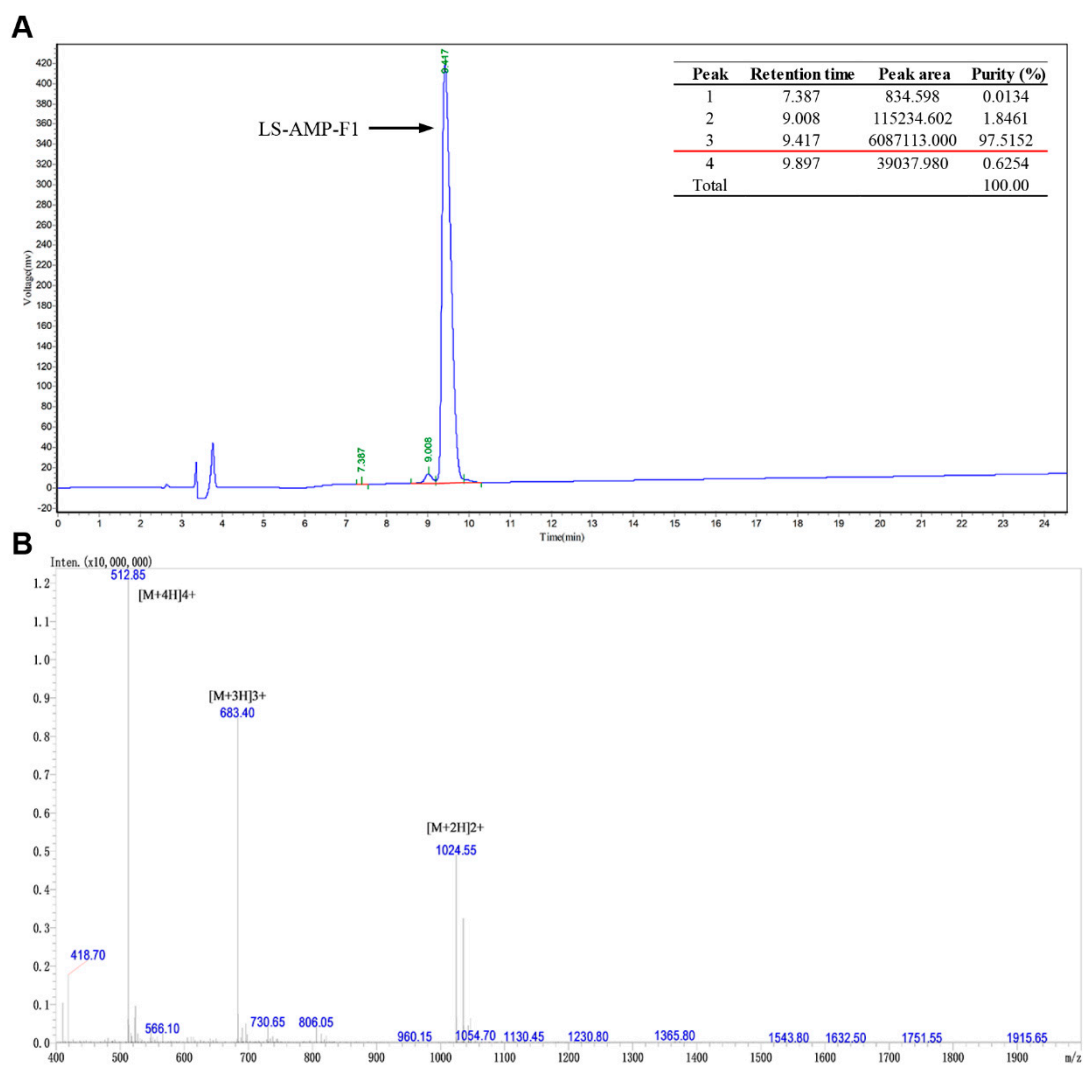

Figure S3. The HPLC (A) and MS (B) profiles of LS-AMP-F1.

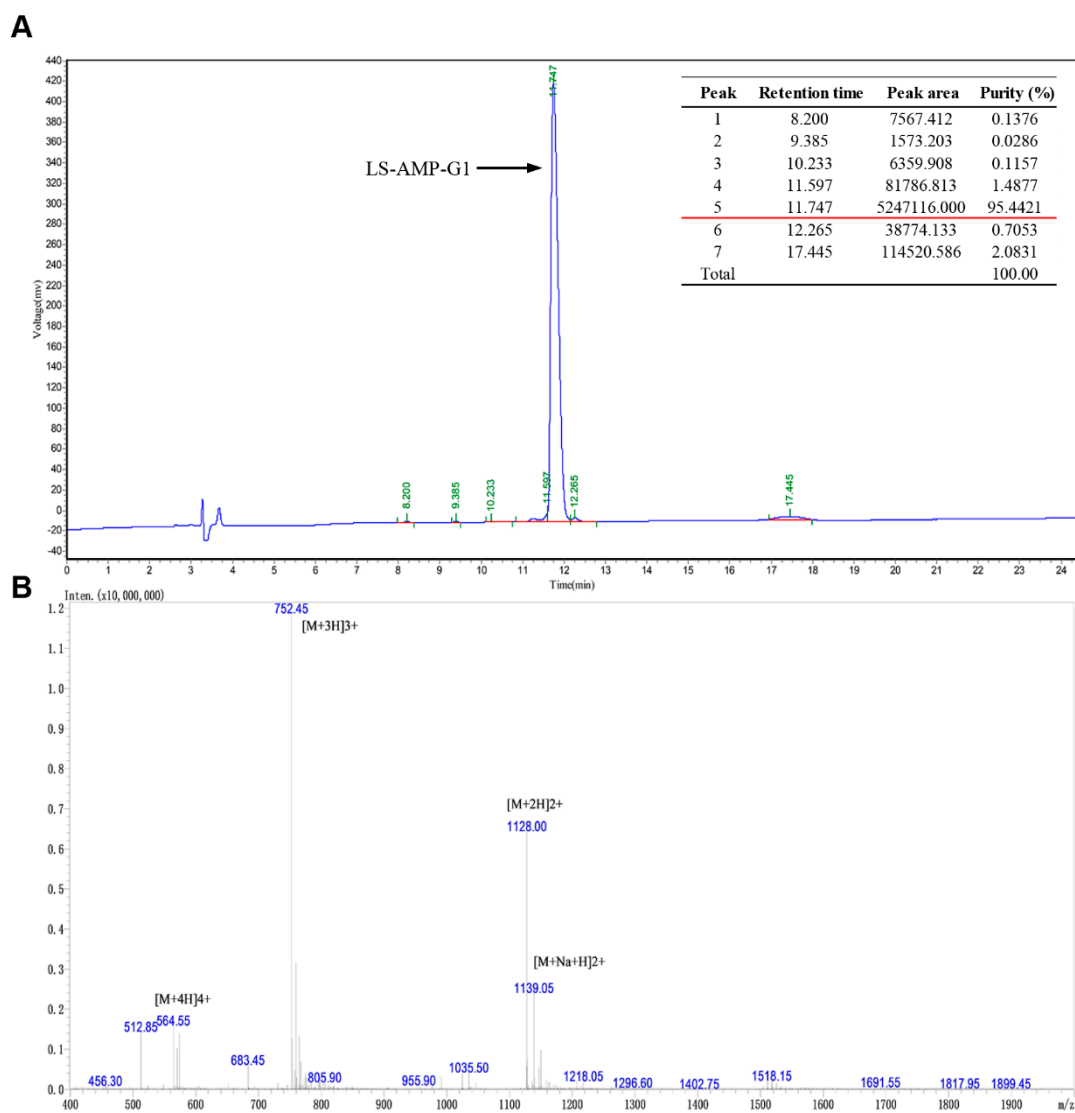

Figure S4. The HPLC (A) and MS (B) profiles of LS-AMP-G1.

Table S1. The clinical profiles of MDR strains isolated from 30 cases.

| Species             | Number | Resistant type | Age range | Disease               | Specimen type | Sample number |
|---------------------|--------|----------------|-----------|-----------------------|---------------|---------------|
| <i>E. faecium</i>   | 1359   | None           | 80-90     | UTI                   | urine         | 20220505117   |
|                     | 1320   | VRE            | 20-30     | AP                    | blood         | 20220405146   |
| <i>S.aureus</i>     | 1090   | MRSA           | 40-50     | CI                    | urine         | 20211101018   |
|                     | 1022   | MRSA           | 60-70     | injury                | sputum        | 20210930047   |
|                     | 1065   | MRSA           | 50-60     | diabetic foot         | excretion     | 20211020125   |
|                     | 1081   | MRSA           | 70-80     | head trauma           | sputum        | 20211027035   |
|                     | 1049   | CR             | 40-50     | open injuries         | excretion     | 20211017048   |
| <i>K.pneumoniae</i> | 1096   | None           | 60-70     | brainstem infarction  | blood         | 20211105003   |
|                     | 1041   | CR             | 0-10      | fever                 | urine         | 20211013047   |
|                     | 1044   | CR             | 50-60     | HE                    | blood         | 20211014205   |
| <i>A.baumannii</i>  | 1055   | CR             | 50-60     | buring                | excretion     | 20211018150   |
|                     | 1023   | CR             | 60-70     | stroke                | sputum        | 20211005014   |
|                     | 1025   | CR             | 70-80     | abdominal pain        | sputum        | 20211008184   |
|                     | 1032   | CR             | 70-80     | abdominal pain        | urine         | 20211009174   |
|                     | 1038   | CR             | 70-80     | abdominal pain        | blood         | 20211012080   |
|                     | 1040   | CR             | 60-70     | gout                  | BALF          | 20211013103   |
|                     | 1121   | CR             | 50-60     | aneurysm              | sputum        | 20211115011   |
| <i>P.aeruginosa</i> | 1088   | CR             | 80-90     | pneumonia             | sputum        | 20211031041   |
|                     | 1099   | CR             | 80-90     | pneumonia             | sputum        | 20211104085   |
|                     | 1095   | CR             | 60-70     | COPD                  | sputum        | 20211104106   |
| <i>E.coli</i>       | 1270   | CR             | 70-80     | prostatic hyperplasia | urine         | 20220223151   |
|                     | 1172   | CR             | 70-80     | hematencephalon       | urine         | 20211215062   |
|                     | 1188   | CR             | 70-80     | hematencephalon       | urine         | 20211224059   |
|                     | 1064   | ESBLs          | 70-80     | notalgia              | urine         | 20211019073   |
|                     | 1010   | ESBLs          | 70-80     | pancreatitis          | blood         | 20210915118   |
|                     | 1278   | ESBLs          | 70-80     | abdominal pain        | excretion     | 20220301065   |
|                     | 1165   | ESBLs          | 60-70     | abdominal pain        | urine         | 20211212047   |
|                     | 1288   | ESBLs          | 50-60     | ureteral stones       | blood         | 20220304189   |
|                     | 1170   | ESBLs          | 60-70     | hematencephalon       | sputum        | 20211214079   |
|                     | 1156   | ESBLs          | 70-80     | UTI                   | blood         | 20211206179   |

VRE: Vancomycin-resistant enterococcus; MRSA: Methicillin-resistant Staphylococcus aureus; CR: Carbapenem-Resistant; ESBLs: extended spectrum beta-lactamases; UTI: urinary tract infection; AP: acute pancreatitis; CI: cerebral infarction; HT: Hepatic Encephalopathy; COPD: chronic obstructive pulmonary disease; BALF: bronchoalveolar lavage fluid.

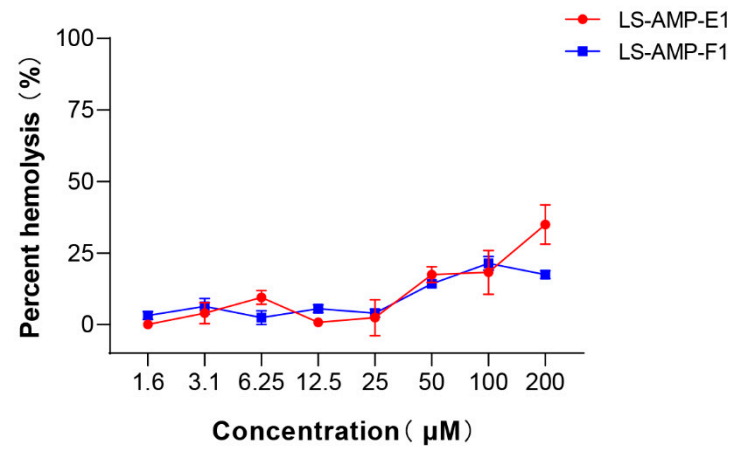

Figure S5. The hemolytic effects of LS-AMP-F1 and LS-AMP-E1 on mouse erythrocytes. Data represent means  $\pm$  SD of 3 individual experiments.

Table S2. The MICs of the checkerboard test for standard strains.

| Peptides/Antibiotics        |                | Strains                            |                                 |
|-----------------------------|----------------|------------------------------------|---------------------------------|
|                             |                | <i>E. coli</i><br>CCTCC AB 2018675 | <i>S. albus</i><br>CGMCC 1.3374 |
| MIC LS-AMP-E1<br>( $\mu$ M) | Alone          | 6.25                               | 12.5                            |
|                             | with AZI       | 0.3906                             | 0.3906                          |
| MIC AZI<br>( $\mu$ g/mL)    | Alone          | 0.05                               | 3.1                             |
|                             | with LS-AMP-E1 | 0.025                              | 0.775                           |
| MIC LS-AMP-E1<br>( $\mu$ M) | Alone          | 6.25                               | 12.5                            |
|                             | with ERY       | 1.5625                             | 0.3906                          |
| MIC ERY<br>( $\mu$ g/mL)    | Alone          | 6.25                               | 6.25                            |
|                             | with LS-AMP-E1 | 1.5625                             | 1.5625                          |
| MIC LS-AMP-E1<br>( $\mu$ M) | Alone          | 6.25                               | 12.5                            |
|                             | with DOX       | 0.1953                             | 12.5                            |
| MIC DOX<br>( $\mu$ g/mL)    | Alone          | 1.6                                | 0.025                           |
|                             | with LS-AMP-E1 | 0.4                                | 0.0008                          |
| MIC LS-AMP-F1<br>( $\mu$ M) | Alone          | 12.5                               | 6.25                            |
|                             | with AZI       | 3.125                              | 3.125                           |
| MIC AZI<br>( $\mu$ g/mL)    | Alone          | 0.05                               | 3.1                             |
|                             | with LS-AMP-F1 | 0.0016                             | 0.003                           |
| MIC LS-AMP-F1<br>( $\mu$ M) | Alone          | 12.5                               | 6.25                            |
|                             | with ERY       | 3.125                              | 0.1953                          |
| MIC ERY<br>( $\mu$ g/mL)    | Alone          | 6.25                               | 6.25                            |
|                             | with LS-AMP-F1 | 0.0977                             | 1.5625                          |
| MIC LS-AMP-F1<br>( $\mu$ M) | Alone          | 12.5                               | 6.25                            |
|                             | with DOX       | 3.125                              | 1.5625                          |
| MIC DOX<br>( $\mu$ g/mL)    | Alone          | 1.6                                | 0.025                           |
|                             | with LS-AMP-F1 | 0.2                                | 0.00625                         |
| MIC Lycosin-I<br>( $\mu$ M) | Alone          | 3.1                                | 1.6                             |
|                             | with AZI       | 0.775                              | 0.05                            |
| MIC AZI<br>( $\mu$ g/mL)    | Alone          | 0.05                               | 3.1                             |
|                             | with Lycosin-I | 0.025                              | 0.775                           |
| MIC Lycosin-I<br>( $\mu$ M) | Alone          | 3.1                                | 1.6                             |
|                             | with ERY       | 0.0969                             | 0.05                            |
| MIC ERY<br>( $\mu$ g/mL)    | Alone          | 6.25                               | 6.25                            |
|                             | with Lycosin-I | 3.125                              | 1.5625                          |
| MIC Lycosin-I<br>( $\mu$ M) | Alone          | 3.1                                | 1.6                             |
|                             | with DOX       | 0.0484                             | 0.025                           |
| MIC DOX<br>( $\mu$ g/mL)    | Alone          | 1.6                                | 0.025                           |
|                             | with Lycosin-I | 0.4                                | 0.025                           |



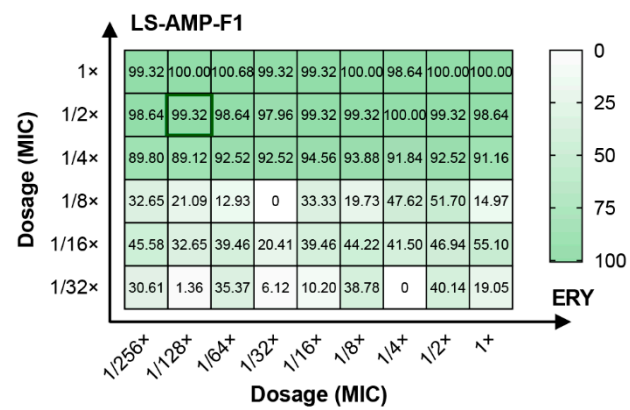

Figure S6. Inhibition rate of the checkerboard test for MDR *E. faecium* (1320).

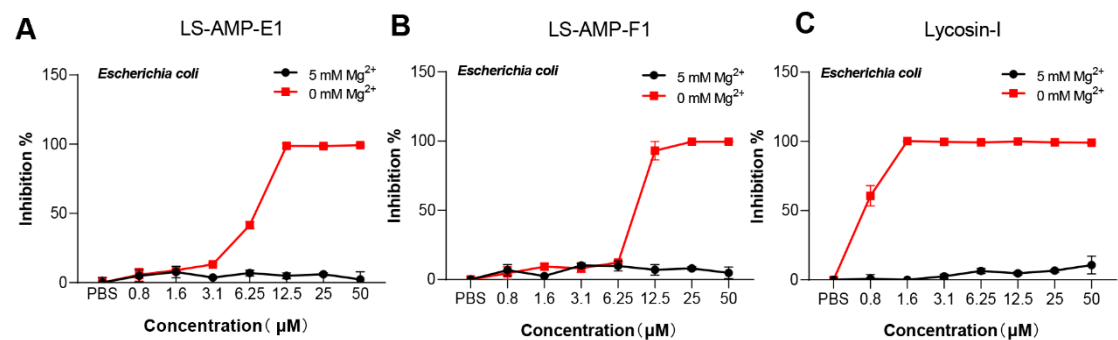

Figure S7. Effect of Mg<sup>2+</sup> on the antimicrobial activity of LS-AMP-E1 (A), LS-AMP-F1 (B) and Lycosin-I (C) against a strain of *E. coli*.
